# Supplementary material for: Modulation of FLT3-ITD Localization and Targeting of Distinct Downstream Signaling Pathways as Potential Strategies to Overcome FLT3-Inhibitor Resistance
Source: MDPI journal article supplement (doi:10.3390/cells10112992), 2021-11-03
Supplement: s1 [file s1]

## Supplementary material

**Table S1. Detailed statistical comparison of MTS and Annexin V assay in Figure 1:** Illustration of apoptosis rates and *p* values in addition to in Figure 1 demonstrated MTS and Annexin V assays for Ba/F3 ITD variants with or without pre-treatment of 1 $\mu$ g/ml tunicamycin for 24 h prior to adding indicated concentrations of 17AAG. IC<sub>50</sub> for 17-AAG was determined using nonlinear regression model in GraphPad. Two-tailed, unpaired *t*-test was performed for indicated DMSO (0.1% v/v) and tunicamycin conditions (mean values of triplicates obtained from MTS assay).

| Ba/F3-ITD variant,<br>17AAG in nM | Annexin V negative<br>(DMSO vs. tunicamycin) | P values of t-test (DMSO vs.<br>tunicamycin) | IC <sub>50</sub> of 17AAG in nM (MTS) |
|-----------------------------------|----------------------------------------------|----------------------------------------------|---------------------------------------|
| <b>598/599 (JM, 12)</b>           |                                              |                                              |                                       |
| 0nM                               | 95.9 vs. 92.2                                | 0.0477                                       | 538.5 vs. 287.3                       |
| 125nM                             | 94.5 vs. 88.6                                | 0.0271                                       |                                       |
| 250nM                             | 91.4 vs. 75.4                                | 0.0047                                       |                                       |
| 500nM                             | 82 vs. 52.1                                  | 0.0033                                       |                                       |
| 1000nM                            | 62.7 vs. 38.9                                | 0.0023                                       |                                       |
| <b>G613E (TKD1, 33)</b>           |                                              |                                              |                                       |
| 0nM                               | 95.3 vs. 71.7                                | 0.0006                                       | 172.9 vs. 36.8                        |
| 125nM                             | 90.9 vs. 41.1                                | 0.0011                                       |                                       |
| 250nM                             | 82.8 vs. 32.8                                | 0.0006                                       |                                       |
| 500nM                             | 78.9 vs. 26.6                                | 0.0007                                       |                                       |
| 1000nM                            | 72.7 vs. 24.7                                | 0.0004                                       |                                       |
| <b>FV605YF (JM, 14)</b>           |                                              |                                              |                                       |
| 0nM                               | 95.9 vs. 90.8                                | 0.0029                                       | 279.7 vs. 94.9                        |
| 125nM                             | 91.7 vs. 74.3                                | 0.0195                                       |                                       |
| 250nM                             | 85.6 vs. 52.5                                | 0.0025                                       |                                       |
| 500nM                             | 73.9 vs. 37.6                                | 0.0021                                       |                                       |
| 1000nM                            | 67.6 vs. 33                                  | 0.0010                                       |                                       |
| <b>E611V (TKD1, 32)</b>           |                                              |                                              |                                       |
| 0nM                               | 94.6 vs. 92.2                                | 0.1609                                       | 430.6 vs. 234.1                       |
| 125nM                             | 93.6 vs. 85.1                                | 0.0612                                       |                                       |
| 250nM                             | 90.2 vs. 71.3                                | 0.0282                                       |                                       |
| 500nM                             | 81.3 vs. 51.7                                | 0.0137                                       |                                       |
| 1000nM                            | 69.0 vs. 42.8                                | 0.0089                                       |                                       |

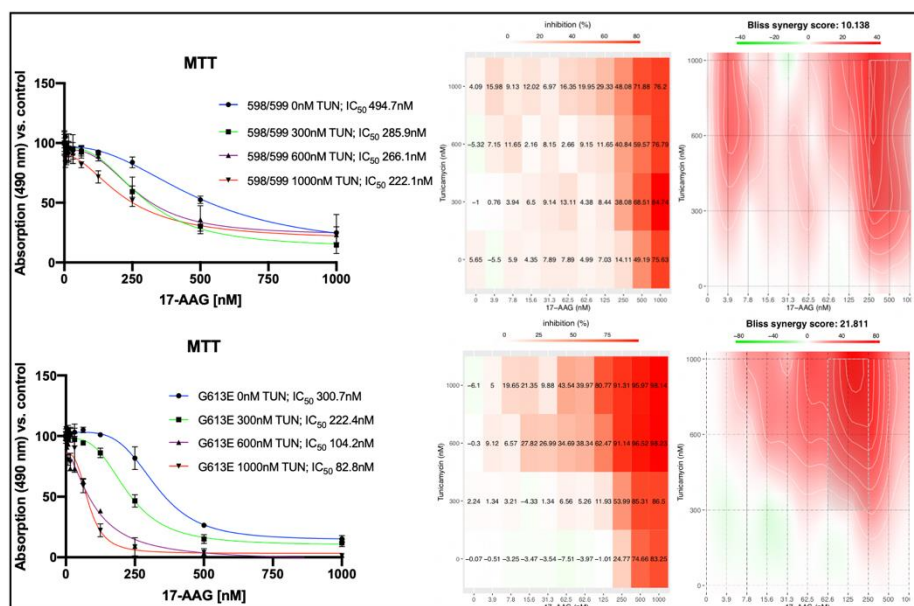

**Figure S1:** Data of MTS assays (*left*) are demonstrated as relative absorption compared to untreated control. 17-AAG concentration-dependent metabolic activity of both Ba/F3-ITD variants after 24 h pre-incubation with indicated tunicamycin concentrations are shown. 17-AAG was added for further 24 h.  $IC_{50}$  values are indicated for 17-AAG, dependent on different concentrations of pre-treatment with tunicamycin. Calculation of potential synergy in the right section shows a Bliss synergy score of 10.1 and 21.8 for Ba/F3 598/599 and G613E variant, respectively.

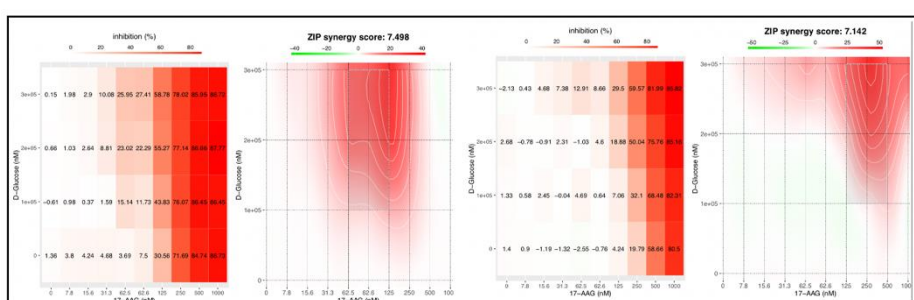

**Figure S2:** Corresponding calculation of potential synergy effects for MTS assays demonstrated in Figure 2C for Ba/F3 598/599 and G613E variant after 8 h pre-incubation with indicated 2-deoxy-D-glucose concentrations are shown. ZIP synergy score was 7.4 and 7.1 for Ba/F3 G613E and 598/599, respectively.

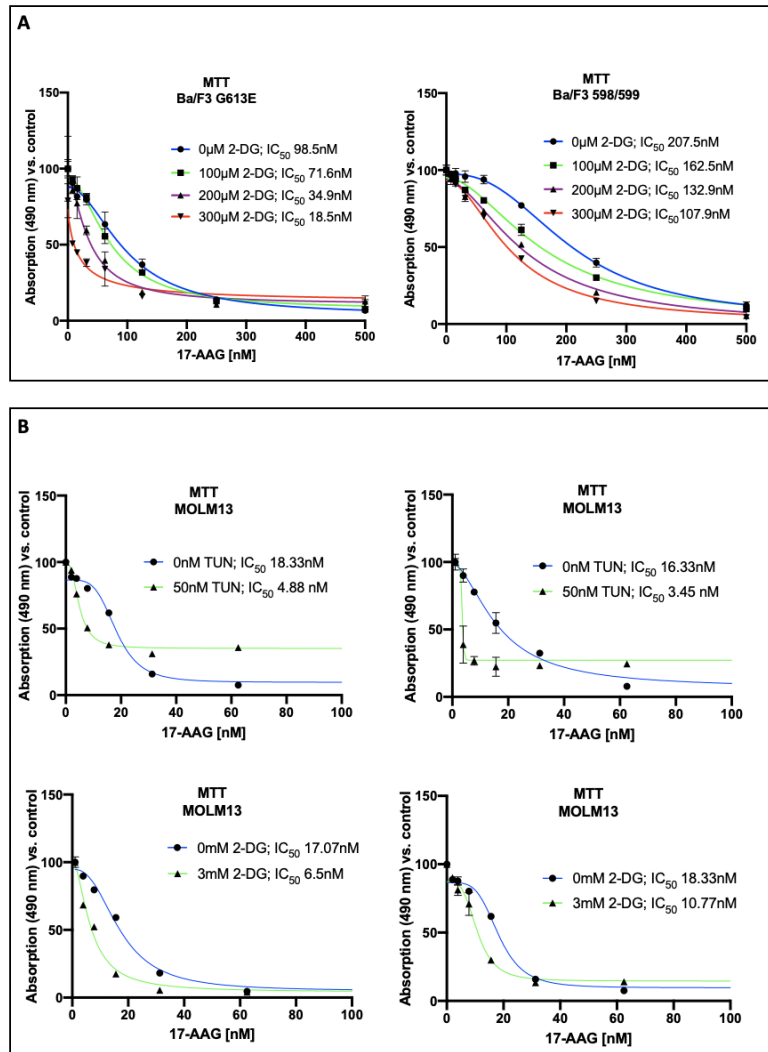

**Figure S3: A Biological replicates for MTS experiments shown in Figure 2C.** Data is demonstrated as relative absorption compared to untreated control. 17-AAG concentration-dependent metabolic activity of both Ba/F3-ITD variants after 8 h pre-incubation with indicated 2-deoxy-D-glucose concentrations are demonstrated. 17-AAG was added for further 24 h,  $IC_{50}$  values are indicated for 17-AAG dependent on different concentrations of pre-treatment with 2-deoxy-D-glucose. Each assay was performed in technical triplicates.

**S4: B Biological replicates for MTS experiments shown in Figure 3.** Data is demonstrated as relative absorption compared to untreated control. 17-AAG concentration-dependent metabolic activity of MOLM13 cells after 24 h pre-incubation with indicated 2-deoxy-D-glucose and tunicamycin concentrations are demonstrated. 17-AAG was added for further 24 h and  $IC_{50}$  values are indicated for 17-AAG dependent on different concentrations of pre-treatment with both substances. Each assay was performed in technical triplicates.
